# Supplementary material
Source: PubMed Central journal article supplement (PMC2492597)
Supplement: pp.108.118679_2.pdf [file pp.108.118679_2.pdf]

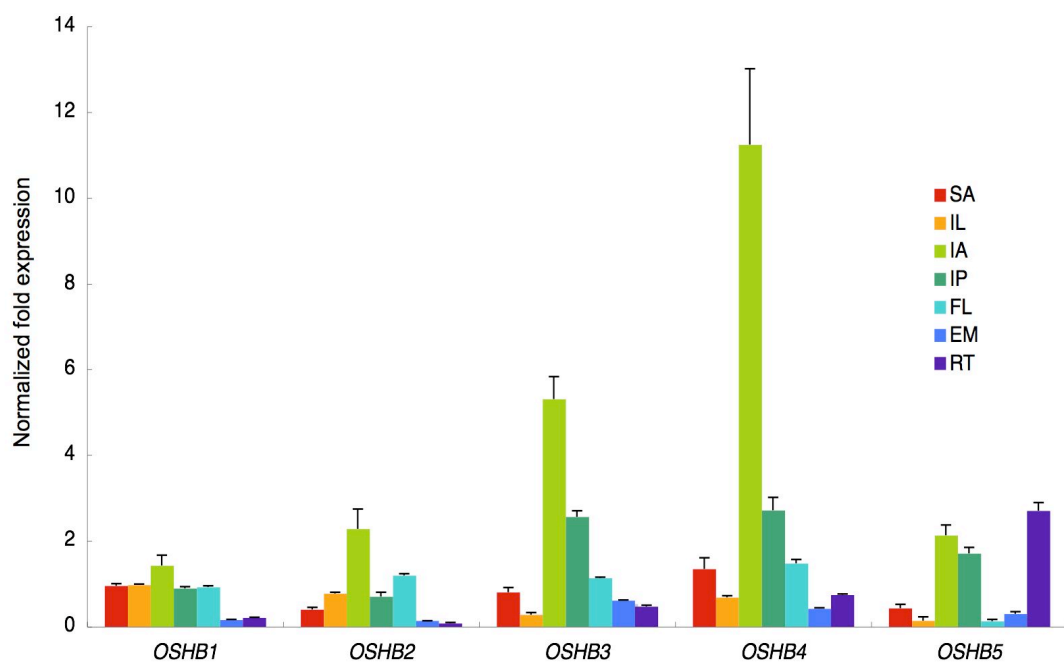

**Figure S2.** Real-time RT-PCR analysis of *OSHB* genes in various tissues. Expression level was normalized to that of *eEF-1 $\alpha$* . Bars indicate standard deviation. SA, shoot apex including young leaf primordia; IL, immature leaf; IA, 5-mm-long inflorescence apex; IP, 5-cm-long immature panicle; FL, immature flower; EM, embryos at 5 days after pollination; RT, root.
