# Supplementary material
Source: PubMed Central journal article supplement (PMC2492597)
Supplement: pp.108.118679_3.pdf [file pp.108.118679_3.pdf]

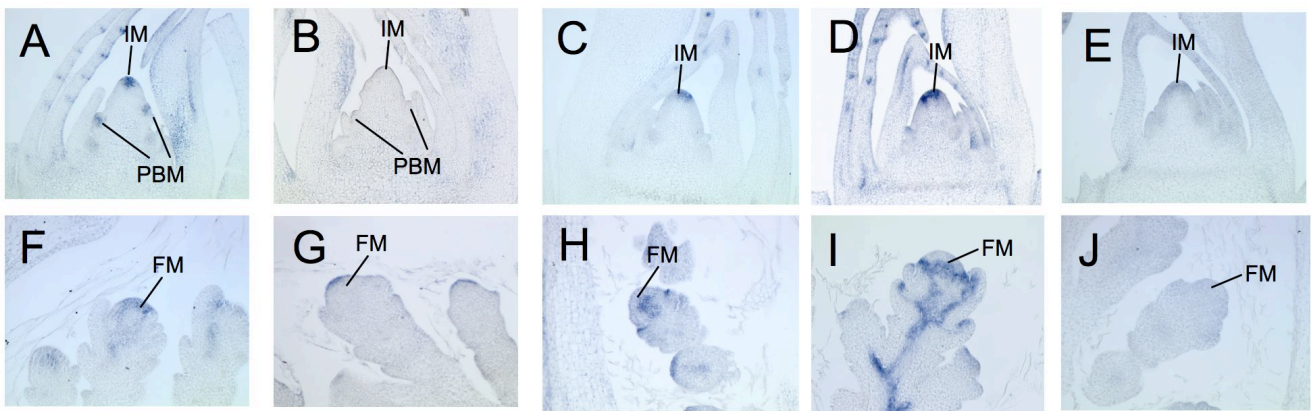

**Figure S3.** *In situ* localization of *OSHB* transcripts in reproductive phase. A to E, Longitudinal sections of wild-type inflorescence apices. F to J, Longitudinal sections of wild-type spikelets. A and F, *OSHB1* expression. B and G, *OSHB2* expression. C and H, *OSHB3* expression. D and I, *OSHB4* expression. E and J, *OSHB5* expression. IM, inflorescence meristem; PBM, primary branch meristem; FM, floral meristem.
