# Supplementary material
Source: PubMed Central journal article supplement (PMC2492597)
Supplement: pp.108.118679_4.pdf [file pp.108.118679_4.pdf]

**Table SI. Primers and TaqMan probes used in this study**

|                                               |                                                                    |
|-----------------------------------------------|--------------------------------------------------------------------|
| <i>OSHB3</i> primers for <i>in situ</i> probe | 5'-CAATAGCTCCTTCTCGACTTGG-3'<br>5'-GTTTCATCCACACAGCAGCAGAA-3'      |
| <i>OSHB4</i> primers for <i>in situ</i> probe | 5'-GCTATTTGATCCGCCCATGTGA-3'<br>5'-CAAGAGTAGATGCCAGGTCAAG-3'       |
| <i>OSHB5</i> primers for <i>in situ</i> probe | 5'-GCCAGCAACTACCAAGATACAC-3'<br>5'-TTTCTCCAGCGTCATGTCTTGG-3'       |
| <i>OSHB1</i> primers for real-time RT-PCR     | 5'-CTTGATATGAAAACAGATGGTGCAT-3'<br>5'-GAGGCTTGAGCTGTTGCTGAA-3'     |
| <sup>a</sup> <i>OSHB1</i> TaqMan probe        | 5'-AGATTTGGCATCTAGTCTT-3'                                          |
| <i>OSHB2</i> primers for real-time RT-PCR     | 5'-GCTGAACATGAAAACAGATGGTACA-3'<br>5'-CCTGTGGGCTGTGCAGTTG-3'       |
| <sup>a</sup> <i>OSHB2</i> TaqMan probe        | 5'-AGATTTGGCATCTAGCCTT-3'                                          |
| <i>OSHB3</i> primers for real-time RT-PCR     | 5'-GGACCCAGATCGGAATGA-3'<br>5'-TCCGGTGTGAGCCCTATAGC-3'             |
| <sup>a</sup> <i>OSHB3</i> TaqMan probe        | 5'-CCTCCAGCCTCTCC-3'                                               |
| <i>OSHB4</i> primers for real-time RT-PCR     | 5'-CAGGCTTCCGTGTGATACCA-3'<br>5'-AAGTGTGCGTGTGCGCAGATG-3'          |
| <sup>a</sup> <i>OSHB4</i> TaqMan probe        | 5'-TGGCAAGACGGATGCA-3'                                             |
| <i>OSHB5</i> primers for real-time RT-PCR     | 5'-CGATCAAGGGAGGAAGAACCCT-3'<br>5'-CATCCCCTGCTCCATGATG-3'          |
| <sup>a</sup> <i>OSHB5</i> TaqMan probe        | 5'-TGCACAGAGCTCCCCA-3'                                             |
| <i>OsIAA9</i> primers for real-time RT-PCR    | 5'-GCCATGGGATGATTTTGC-3'<br>5'-TCTCCTTCAGTTCAGTTAACCAGTA-3'        |
| <sup>a</sup> <i>OsIAA9</i> TaqMan probe       | 5'-ATCTGTGAAACGCCTGAAG-3'                                          |
| <i>eEF-1α</i> primers for real-time RT-PCR    | 5'-CGCTCTTCTTGCTTTCCTTCTTG-3'<br>5'-TAGGATGAGACTTCCTTCACGATTTTC-3' |
| <sup>a</sup> <i>eEF-1α</i> TaqMan probe       | 5'-CAACAAGATGGATGCCAC-3'                                           |

<sup>a</sup>FAM dye is linked to the 5'end of the probes, and a nonfluorescent quencher and a minor groove binder to the 3'end of the probes.
